# Supplementary material for: IL-6 contributes to metastatic switch via the differentiation of monocytic-dendritic progenitors into prometastatic immune cells
Source: PubMed Central journal article supplement (PMC8212411; doi:10.1136/jitc-2021-002856), 2021-06-17
Supplement: jitc-2021-002856supp002.pdf [file jitc-2021-002856supp002.pdf]

**Supplemental Materials Online**

Magidey-Klein et. al.,

**Supplemental Table S2: Breast and lung cancer patient characteristics**

| Sample ID            | Age | Gender | Tumor type                        | Grade | Stage   | Early/<br>Advanced |
|----------------------|-----|--------|-----------------------------------|-------|---------|--------------------|
| <b>Breast cancer</b> |     |        |                                   |       |         |                    |
| 308_A_1              | 62  | F      | Invasive lobular carcinoma        | n/a   | II      | A                  |
| 308_A_2              | 50  | F      | Invasive ductal carcinoma         | G2    | II      | A                  |
| 308_E_1              | 49  | F      | Invasive ductal carcinoma         | G1    | IA      | E                  |
| 308_E_2              | 66  | F      | Invasive ductal carcinoma         | G2    | IA      | E                  |
| 308_A_3              | 44  | F      | Invasive papillary carcinoma      | G2-3  | III     | A                  |
| 308_E_3              | 55  | F      | Ductal carcinoma in situ          | G2    | 0       | E                  |
| 308_E_4              | 69  | F      | Ductal carcinoma in situ          | G2-3  | 0       | E                  |
| 308_E_6              | 68  | F      | Ductal carcinoma in situ          | G3    | 0       | E                  |
| 308_A_4              | 81  | F      | Invasive lobular carcinoma        | G1-2  | IIIA    | A                  |
| 308_E_9              | 65  | F      | Invasive ductal carcinoma         | G2    | IA      | E                  |
| 308_A_5              | 56  | F      | Invasive lobular carcinoma        | G3    | III     | A                  |
| 308_E_11             | 60  | F      | Invasive ductal carcinoma         | G2    | IA      | E                  |
| 308_E_12             | 47  | F      | Ductal carcinoma in situ          | G2    | 0       | E                  |
| 308_A_6              | 48  | F      | Invasive ductal carcinoma         | G3    | IIA     | A                  |
| 308_E_13             | 48  | F      | Invasive ductal carcinoma         | G1    | IA      | E                  |
| 308_A_8              | 78  | F      | Infiltrating ductal carcinoma     | G2    | IIB     | A                  |
| 308_A_9              | 73  | F      | Invasive ductal carcinoma         | n/a   | IV      | A                  |
| 308_A_10             | 38  | F      | Invasive ductal carcinoma         | G3    | IIB     | A                  |
| <b>Lung cancer</b>   |     |        |                                   |       |         |                    |
| 297A_A_10            | 73  | F      | Papillary adenocarcinoma          | G3    | IV      | A                  |
| 297A_E_6             | 59  | F      | Mucinous adenocarcinoma           | G1    | IA      | E                  |
| 297A_E_3             | 67  | M      | Papillary adenocarcinoma          | n/a   | IIA     | E                  |
| 297A_A_3             | 48  | M      | Papillary adenocarcinoma          | n/a   | IIIA    | A                  |
| 297A_A_3.1           | 48  | M      | Papillary adenocarcinoma          | n/a   | IIIA    | A                  |
| 297A_A_4             | 53  | M      | Clear cell carcinoma              | n/a   | IV      | A                  |
| 297A_E_5             | 69  | F      | Adenocarcinoma in situ            | n/a   | 0       | E                  |
| 297A_A_9             | 80  | M      | Adenocarcinoma (acinar and solid) | n/a   | IIIA-IV | A                  |
| 297A_A_5             | 85  | F      | Squamous cell carcinoma           | G3    | IIIB    | A                  |
| 297A_A_6             | 71  | M      | Squamous cell carcinoma           | G3    | IIIB    | A                  |
| 297A_A_7             | 74  | M      | Adenocarcinoma                    | G3    | IIIA    | A                  |
| 297A_E_8             | 61  | M      | Adenocarcinoma in situ            | n/a   | 0       | E                  |
| 297A_E_9             | 63  | F      | Adenocarcinoma in situ            | n/a   | 0       | E                  |
| 297A_E_10            | 77  | F      | Adenocarcinoma                    | G1    | IA      | E                  |
| 297A_A_8             | 60  | F      | Adenocarcinoma (acinar and solid) | n/a   | IIIA    | A                  |
| 297_E_1              | 68  | F      | Adenocarcinoma                    | G1    | IA      | E                  |
| 297_E_2              | 70  | F      | Adenocarcinoma (acinar)           | G1    | IA      | E                  |

**Supplemental Table S3: Phenotype characteristics of immune cells in murine and human.**

| <b>Population</b>           | <b>Markers</b>                                                       |
|-----------------------------|----------------------------------------------------------------------|
| <b>In murine</b>            |                                                                      |
| LSK                         | Lineage-Sca-1+CD117+                                                 |
| GMP                         | Lineage-Sca-1-CD117+CD34-FcyR+                                       |
| CMP                         | Lineage-Sca-1-CD117+CD34+FcyR-                                       |
| MEP                         | Lineage-Sca-1-CD117+CD34- FcyR-                                      |
| MDP                         | Lineage-Sca-1-CD117+CD34+FcyR-CD115+FLT3+                            |
| Granulocytes                | CD11b+Ly6G+/Gr-1+                                                    |
| Macrophages                 | Cd11b+F4/80+Ly6G-                                                    |
| M1 macrophages              | Cd11b+F4/80+CD11c+Ly6G-                                              |
| M2 macrophages              | CD11b+ F4/80+CD206+Ly6G-                                             |
| Inflammatory monocytes      | CD11b+Ly6C <sup>high</sup> Ly6G <sup>low</sup> CD115+                |
| Anti-inflammatory monocytes | CD11b+Ly6C <sup>low</sup> Ly6G-                                      |
| Dendritic cells             | Cd11b+F4/80+Ly6G-MHCII+                                              |
| B cells                     | CD45+B220+                                                           |
| T cells                     | CD45+CD3ε+                                                           |
| <b>In human</b>             |                                                                      |
| MDP                         | Lineage-CD34+CD38 <sup>high</sup> CD123 <sup>Int</sup> CD45RA+CD115+ |
| GMP                         | Lineage-CD34+CD38+CD123+CD34RA+                                      |

**Supplemental Table S4: Antibodies against surface markers conjugated with metal ions for CyTOF dataset.**

| <b>Metal</b> | <b>Ab</b> |
|--------------|-----------|
| 141Pr        | CD80      |
| 142Nd        | GR1       |
| 143Nd        | CD86      |
| 144Nd        | F4/80     |
| 145Nd        | CD4       |
| 146Nd        | CD45R     |
| 147Sm        | Ly6c      |
| 148Nd        | CD138     |
| 149Sm        | CD8       |
| 150Nd        | Ly6g      |
| 151Eu        | CD48      |
| 152Sm        | CD90      |
| 153Eu        | CD14      |
| 154Sm        | CD11c     |
| 155Gd        | CD45      |
| 156Gd        | CD49b     |
| 157Gd        | CD19      |
| 158Gd        | CD34      |
| 159Tb        | CD27      |
| 160Gd        | CD69      |
| 161Dy        | CD150     |
| 162Dy        | TCRb      |
| 163Dy        | CD127     |
| 164Dy        | CD28      |
| 165Ho        | CD115     |
| 166Er        | CD133     |
| 167Er        | CD93      |
| 168Er        | CD117     |
| 169Tm        | CD79b     |
| 170Er        | CD62L     |
| 171Yb        | CD44      |
| 172Yb        | CD43      |
| 173Yb        | Sca-1     |
| 174Yb        | Vegfr2    |
| 175Lu        | CD5       |
| 176Yb        | Cd11b     |

Fig. S1

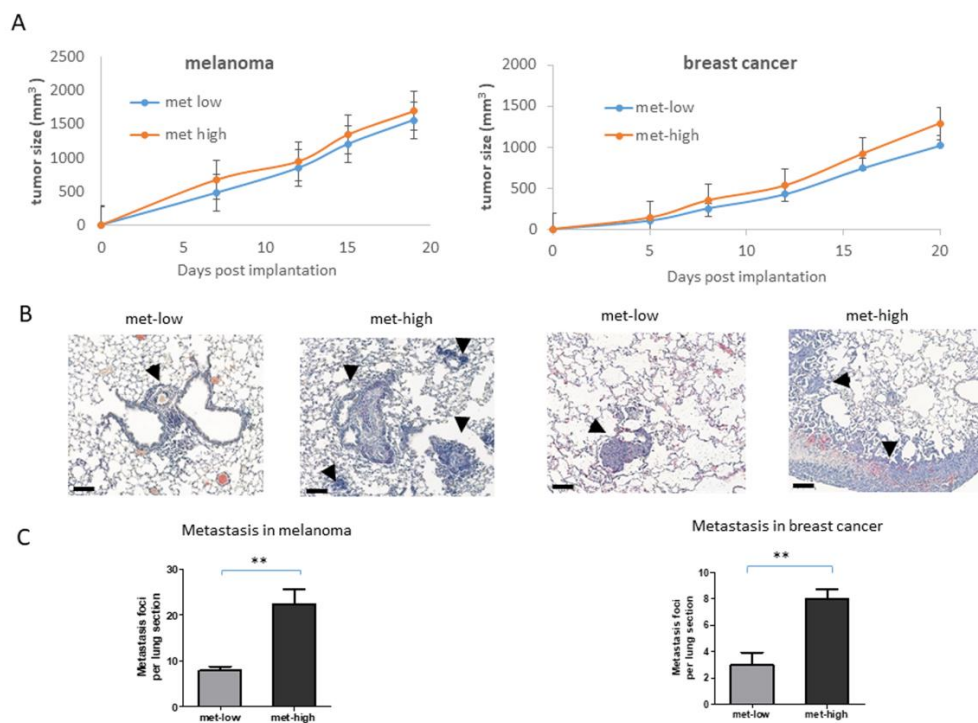

**Figure S1. Rates of tumor growth and metastasis in met-high and met-low melanoma and breast tumor models.** C57BL/6 mice were sub-dermally implanted in the flank with met-low B16-F1 or met-high B16-F10 melanoma cells. BALB/c mice were implanted in the mammary fat pad with met-low 67NR or met-high 4T1 breast cancer cells (n=5 mice/group). Tumor growth was monitored regularly. At endpoint, lungs were removed and assessed for metastasis. (A) Tumor growth curves are presented. (B) Representative lung sections are shown, bar=100 $\mu$ m. Arrows indicate metastatic foci. (C) Metastatic foci per lung section were quantified (n=5 sections/mouse). Significant p values are shown as \*\* p<0.01, as assessed by unpaired two-tailed t-test.

Fig.S2

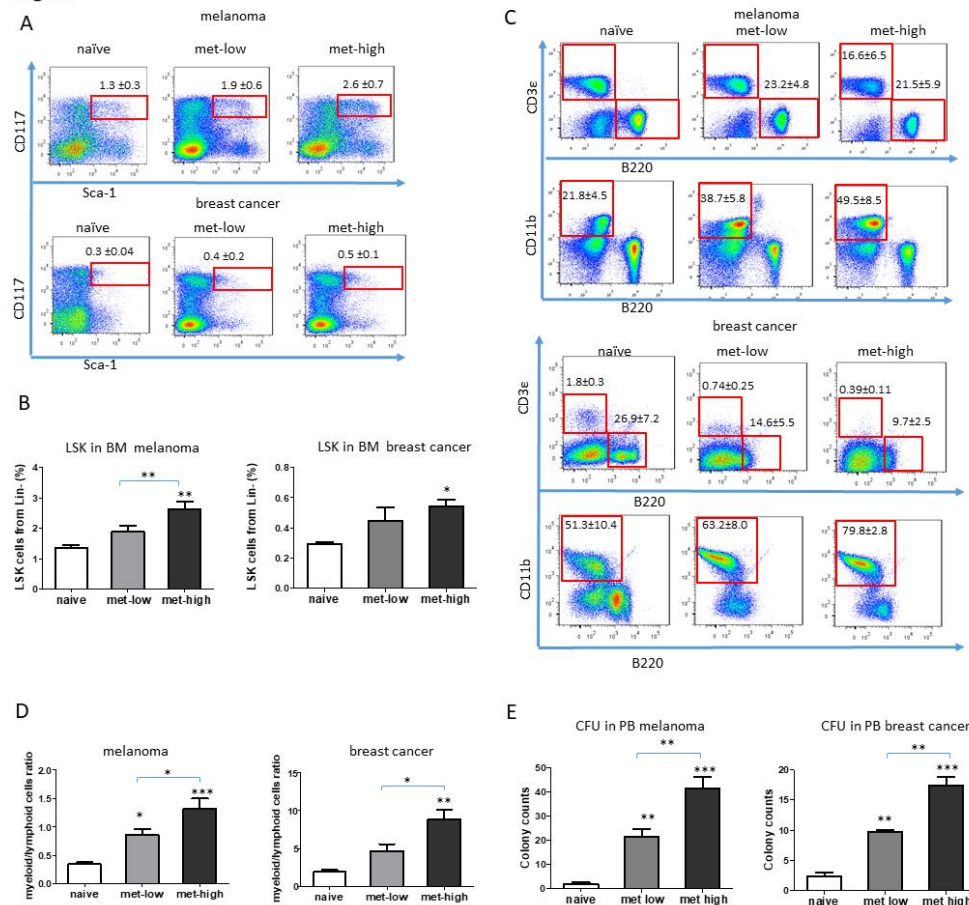

**Figure S2. Metastatic tumors induce myelopoiesis.** Mice were either sub-dermally implanted in the flank with met-low B16-F1 or met-high B16-F10 melanoma cells ( $5 \times 10^5$  cell/mouse), or implanted in the mammary fat pad with met-low 67NR or met-high 4T1 breast cancer cells ( $5 \times 10^5$  cell/mouse). Control mice (naïve) were not implanted with tumor cells. At endpoint (day 18 and day 21, respectively), mice were sacrificed, and bone marrow and blood were harvested. (A) LSK cells in the BM were analyzed by flow cytometry. The cells were previously gated to exclude doublets and lineage positive cells. Representative flow cytometry plots are shown. (B) Quantification of LSK cells from the lineage negative cells ( $n=5-8$  mice/group). (C) Lymphoid T and B cells and myeloid CD11b+ cells were quantified in the BM by flow cytometry. Representative dot plots are shown ( $n=5-8$  mice/group). (D) Myeloid to lymphoid cell ratios in the bone marrow

compartment are shown (n=5-8 mice/group). (E) Circulating hematopoietic stem and progenitor cells in peripheral blood (PB) were evaluated by a colony forming assay. CFU colony counts are shown (n=3-4 mice/group). Statistical significance was assessed by one-way ANOVA, followed by Tukey post-hoc test when comparing more than two groups or unpaired two-tailed t-test when comparing two groups. Asterisks represent significance from control, unless indicated otherwise in the figure. Significant p values are shown as \*,  $p < 0.05$ , \*\*  $p < 0.01$ , \*\*\* $p < 0.001$ .

Fig. S3

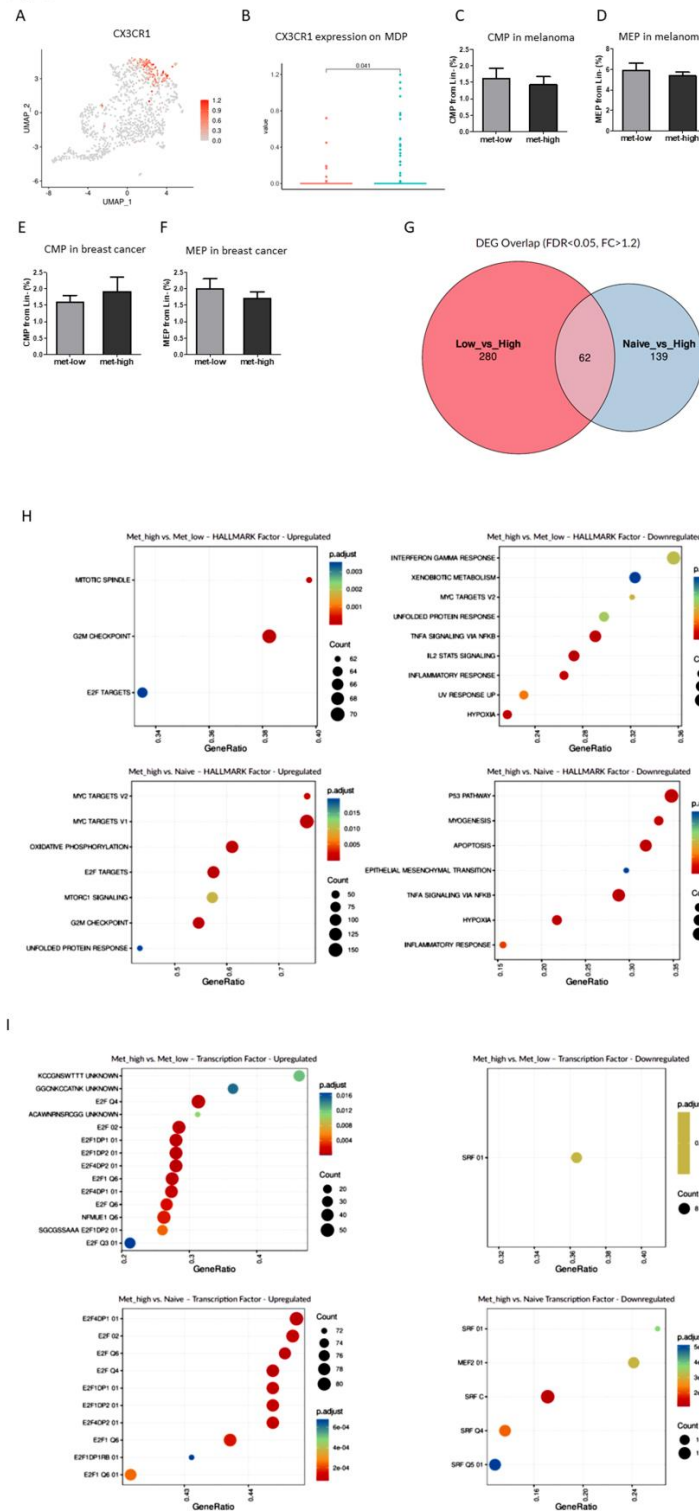

**Figure S3. LSK clustering in met-high and met-low tumors.** Mice were implanted with met-high or met-low melanoma tumor cells. At endpoint, LSK cells were obtained from bone marrow and analyzed by single cell RNA sequencing. (A-B) Single cell CX3CR1 mRNA expression labeling on the UMAP plot (A) and its expression specifically in MDP populations of met-low and met-high tumors (B). Statistical significance was assessed by Wilcoxon rank-sum test. (C-F) Flow cytometry validation of CMP (C,E) and MEP (D, F) percentages from Lin<sup>-</sup> cells of melanoma (C, E) or breast cancer model (D, F) met-low and met-high tumor bearing mice (n=5 mice/group in melanoma model, n=5-10 mice/group in breast cancer model). Results are not statistically significant. (G) Venn diagram of differentially expressed genes (DEGs) in naïve and met-low MDPs vs met-high MDPs. (H) GSEA analysis of upregulated and downregulated biological processes comparing met-low MDPs or naïve MDPs vs met-high MDPs. (I) Transcription factors enrichment in met-low/naïve MDPs comparing with met-low MDPs.



Fig. S4

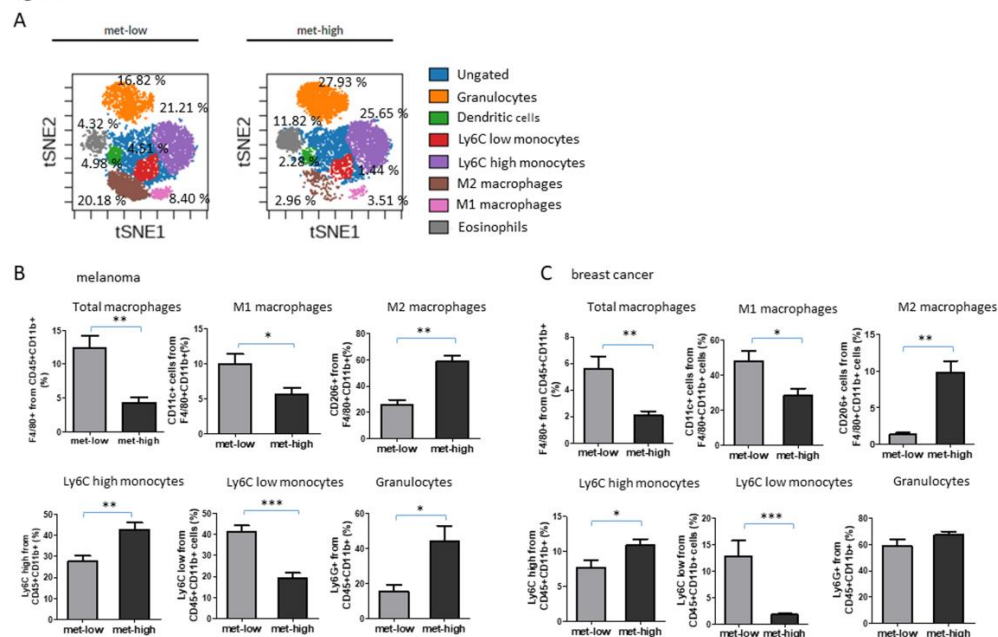

**Figure S4. Immune cell composition in met-high and met-low tumors.** (A-C) Mice were implanted with met-high or met-low tumor cells of melanoma (A-B) or breast cancer (C). At endpoint, tumors were removed and prepared as single cell suspensions. (A) viSNE plot obtained by immune cell CyTOF analysis is based on CD11b<sup>+</sup> myeloid cells of met-low and met-high melanomas (3 samples per group were pooled). (B-C) The percentages of macrophages and their M1 and M2 subsets, Ly6C<sup>high</sup>, Ly6C<sup>low</sup> monocytes and granulocytes were analyzed by flow cytometry on melanoma (B) and breast cancer (C) models (n=5-8 mice for each group). Statistical significance was assessed by unpaired two-tailed t-test. Significant p values are shown as \* p<0.05; \*\* p<0.01; \*\*\* p<0.001.

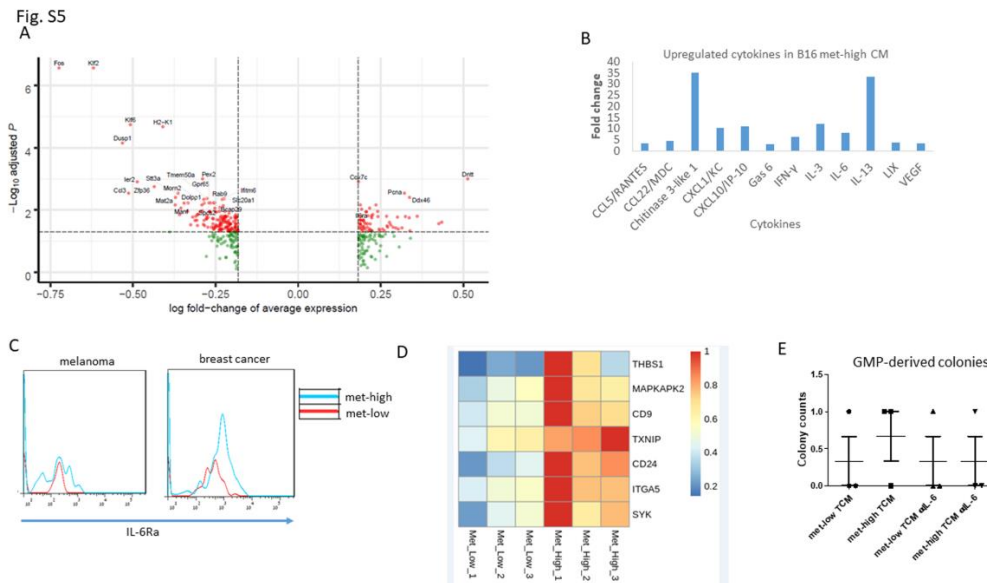

**Figure S5. The secretion profile of met-high tumors is associated with IL-6.** (A) Volcano plot of significantly decreased (left side) and increased (right side) genes in MDP cells (met-high vs. met-low groups; melanoma model; Wilcoxon rank-sum test followed by Benjamini–Hochberg correction). (B) A cytokine array was performed to determine the levels of a range of factors in tumor conditioned medium (TCM) of met-high and met-low melanomas. Fold change is shown (met-high vs. met-low). (C) Representative histogram plots of IL-6Ra expression on MDPs, obtained from bone marrow of met-low and met-high melanoma or breast cancer bearing mice, was assessed by flow cytometry. (D) Heat map of differentially expressed genes of CD45+ live cells, obtained from met-low and met-high melanoma tumors. (E) GMPs from naïve mice were grown in Methocult medium supplemented with met-low or met-high melanoma tumor conditioned medium (TCM) in the presence or absence of anti-IL-6 neutralizing antibodies. GMP-derived colonies were counted ( $n=3$  biological repeats/group).

Fig. S6

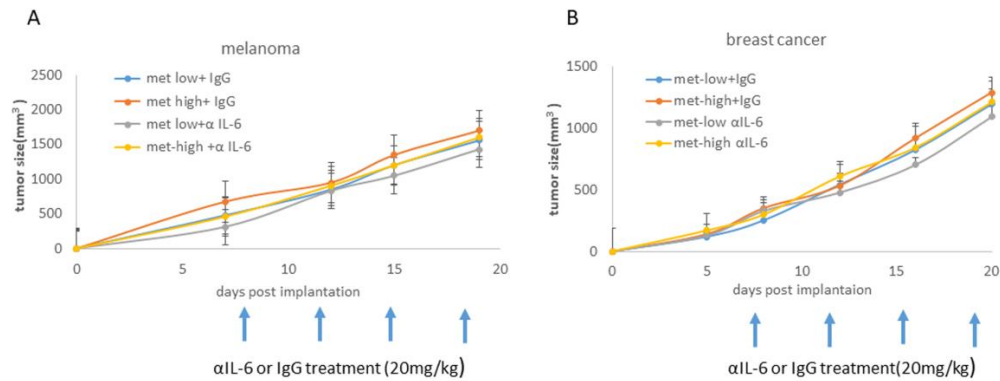

**Figure S6. Blocking IL-6 does not affect primary tumor growth.** Mice were implanted with met-low or met-high (A) melanoma or (B) breast cancer cells. One week later, mice were treated with IgG (control) or anti-IL-6 antibodies twice weekly (indicated by arrows). Tumor growth curves are shown (n=5-8 mice/group).

Fig. S7

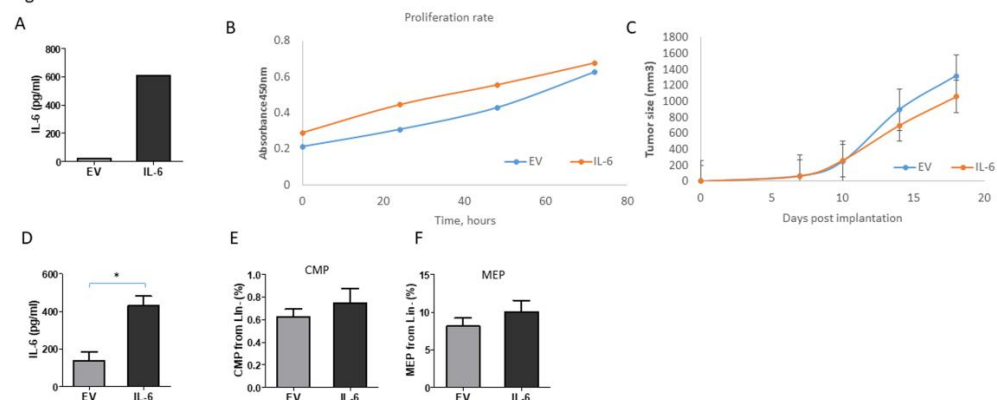

**Figure S7. IL-6 overexpression in met-low tumors and its effect on HSPC lineage.** (A) Conditioned medium collected from IL-6 overexpressing and EV control B16-F1 cells was tested for IL-6 levels by ELISA. (B) Proliferation rate of IL-6 overexpressing cells and EV control cells was tested by XTT assay. (C-G) Eight-to-ten week old C57Bl/6 mice (n=4-6 mice/group) were implanted with B16-F1-IL-6 overexpressing cells or with corresponding control EV cells. Tumor growth was assessed (C). At endpoint (day 18), mice were sacrificed, tumors were removed and the bone marrow was harvested. IL-6 levels were quantified in B16-F1 overexpressing IL-6 and B16-F1 EV control TCM, using ELISA (D). The levels of CMP (E), and MEP (F) from Lin<sup>-</sup> cells were assessed in the bone marrow of mice from both groups by flow cytometry. Statistical significance was assessed by unpaired two-tailed t-test. Significant p values are shown as \* p<0.05.
