# Supplementary material for: IL-6 contributes to metastatic switch via the differentiation of monocytic-dendritic progenitors into prometastatic immune cells
Source: J Immunother Cancer. 2021 Jun 17;9(6):e002856. doi: 10.1136/jitc-2021-002856 (PMC8212411; doi:10.1136/jitc-2021-002856)
Supplement: Supplementary data [file jitc-2021-002856supp001.csv]

gene	cellType	method	avg_logFC	p_val	p_val_adj_BH
Fos	Stem cells (SC.MDP)	wilcox	-0.723828396	9.00E-10	2.75E-07
Klf2	Stem cells (SC.MDP)	wilcox	-0.619541366	1.59E-09	2.75E-07
Klf6	Stem cells (SC.MDP)	wilcox	-0.50790547	1.57E-07	1.82E-05
H2-K1	Stem cells (SC.MDP)	wilcox	-0.409537448	2.45E-07	2.12E-05
Dusp1	Stem cells (SC.MDP)	wilcox	-0.531647009	1.02E-06	7.07E-05
Gpr65	Stem cells (SC.MDP)	wilcox	-0.289273023	1.83E-05	0.000997598
Dntt	Stem cells (SC.MDP)	wilcox	0.513206627	2.02E-05	0.000997598
Cox7c	Stem cells (SC.MDP)	wilcox	0.18251756	3.14E-05	0.001241438
Ier2	Stem cells (SC.MDP)	wilcox	-0.48696433	3.23E-05	0.001241438
Zfp36	Stem cells (SC.MDP)	wilcox	-0.435527562	5.13E-05	0.001775679
Pcna	Stem cells (SC.MDP)	wilcox	0.321556268	9.54E-05	0.002874589
Ccl3	Stem cells (SC.MDP)	wilcox	-0.513236824	0.000101937	0.002874589
Stt3a	Stem cells (SC.MDP)	wilcox	-0.363757523	0.000108005	0.002874589
Ddx46	Stem cells (SC.MDP)	wilcox	0.33707672	0.000168188	0.003938458
Mat2a	Stem cells (SC.MDP)	wilcox	-0.37126206	0.000170742	0.003938458
Tmem50a	Stem cells (SC.MDP)	wilcox	-0.275726785	0.000198022	0.004254559
Slc20a1	Stem cells (SC.MDP)	wilcox	-0.223282784	0.000209039	0.004254559
Ifitm6	Stem cells (SC.MDP)	wilcox	-0.229765906	0.000241264	0.004543026
Dolpp1	Stem cells (SC.MDP)	wilcox	-0.285606372	0.000249473	0.004543026
Pex2	Stem cells (SC.MDP)	wilcox	-0.269817452	0.000340915	0.005842499
Bcap29	Stem cells (SC.MDP)	wilcox	-0.25264155	0.000368736	0.005842499
Rab9	Stem cells (SC.MDP)	wilcox	-0.255572533	0.000371488	0.005842499
Manf	Stem cells (SC.MDP)	wilcox	-0.333463829	0.000396755	0.005968573
Morn2	Stem cells (SC.MDP)	wilcox	-0.284544346	0.000440329	0.006002377
Spcs2	Stem cells (SC.MDP)	wilcox	-0.265709573	0.000447662	0.006002377
Pak1ip1	Stem cells (SC.MDP)	wilcox	-0.345298778	0.000451046	0.006002377
Rexo2	Stem cells (SC.MDP)	wilcox	-0.29113561	0.00054188	0.006857488
Slc7a6	Stem cells (SC.MDP)	wilcox	0.188267338	0.000565317	0.006857488
Creld2	Stem cells (SC.MDP)	wilcox	-0.372125847	0.00059452	0.006857488
Mknk2	Stem cells (SC.MDP)	wilcox	0.235398738	0.00059458	0.006857488
Phb2	Stem cells (SC.MDP)	wilcox	-0.226904816	0.000649813	0.007252753
H2-D1	Stem cells (SC.MDP)	wilcox	-0.237524253	0.000762136	0.0082406
St6galnac4	Stem cells (SC.MDP)	wilcox	-0.354921937	0.00084529	0.008700016
Mdh1	Stem cells (SC.MDP)	wilcox	0.216312205	0.000854915	0.008700016
Mcm6	Stem cells (SC.MDP)	wilcox	-0.252149387	0.00089167	0.008814792
Taf5	Stem cells (SC.MDP)	wilcox	0.19191549	0.000975534	0.009375968
Kat2a	Stem cells (SC.MDP)	wilcox	-0.289629917	0.001152647	0.010778804
Tmem234	Stem cells (SC.MDP)	wilcox	-0.334581166	0.001238267	0.011077308
Heatr1	Stem cells (SC.MDP)	wilcox	0.240666835	0.001254707	0.011077308
9530068E07Rik	Stem cells (SC.MDP)	wilcox	-0.23824989	0.001280614	0.011077308
Hspa1a	Stem cells (SC.MDP)	wilcox	-0.295833517	0.001348025	0.01115598
Krcc1	Stem cells (SC.MDP)	wilcox	-0.268968794	0.001359134	0.01115598
Tmem185b	Stem cells (SC.MDP)	wilcox	-0.222019058	0.001386437	0.01115598
Srsf5	Stem cells (SC.MDP)	wilcox	-0.266141923	0.001496738	0.011393567
Junb	Stem cells (SC.MDP)	wilcox	-0.267704532	0.001508259	0.011393567
Ipo7	Stem cells (SC.MDP)	wilcox	0.206924505	0.001572781	0.011393567
Blm	Stem cells (SC.MDP)	wilcox	0.205108871	0.001572941	0.011393567
Ndufaf4	Stem cells (SC.MDP)	wilcox	-0.250911107	0.00158061	0.011393567
Ctsb	Stem cells (SC.MDP)	wilcox	-0.247239475	0.001649681	0.011648767
Apoe	Stem cells (SC.MDP)	wilcox	-0.209197058	0.001803949	0.012483327
Slc25a39	Stem cells (SC.MDP)	wilcox	-0.302589313	0.002008817	0.013628448
Aamdc	Stem cells (SC.MDP)	wilcox	-0.358822406	0.002132593	0.014007697
Tmem123	Stem cells (SC.MDP)	wilcox	-0.304742712	0.002156181	0.014007697
Abraxas2	Stem cells (SC.MDP)	wilcox	0.225651833	0.002186172	0.014007697
Abcb8	Stem cells (SC.MDP)	wilcox	-0.1887368	0.00224212	0.01410497
Fkbp3	Stem cells (SC.MDP)	wilcox	0.211138559	0.002490044	0.015299498
Srsf4	Stem cells (SC.MDP)	wilcox	-0.277144813	0.002520438	0.015299498
Cntrl	Stem cells (SC.MDP)	wilcox	0.221580409	0.002600099	0.015510936
Timm44	Stem cells (SC.MDP)	wilcox	-0.309541483	0.002723746	0.01584021
Mgat1	Stem cells (SC.MDP)	wilcox	0.360348297	0.002801069	0.01584021
Prdx6	Stem cells (SC.MDP)	wilcox	-0.220170461	0.002904614	0.01584021
Naxd	Stem cells (SC.MDP)	wilcox	-0.227097258	0.002912187	0.01584021
Prpf40a	Stem cells (SC.MDP)	wilcox	0.267668311	0.002977764	0.01584021
Klhdc3	Stem cells (SC.MDP)	wilcox	-0.21356038	0.003001189	0.01584021
Ccnd3	Stem cells (SC.MDP)	wilcox	-0.233958399	0.003004695	0.01584021
Eif4g2	Stem cells (SC.MDP)	wilcox	0.19097749	0.003067324	0.01584021
Ifitm3	Stem cells (SC.MDP)	wilcox	-0.220877914	0.003067324	0.01584021
Gar1	Stem cells (SC.MDP)	wilcox	0.324717116	0.003171725	0.016137326
Tmbim6	Stem cells (SC.MDP)	wilcox	-0.192036868	0.003299749	0.016137326
Eif3g	Stem cells (SC.MDP)	wilcox	-0.219571253	0.00330889	0.016137326
Lrrfip2	Stem cells (SC.MDP)	wilcox	-0.186082353	0.003311417	0.016137326
Anapc13	Stem cells (SC.MDP)	wilcox	0.241538005	0.003361362	0.01615321
Pold3	Stem cells (SC.MDP)	wilcox	-0.31909498	0.003537418	0.016766391
Eif3a	Stem cells (SC.MDP)	wilcox	0.30055423	0.003600278	0.016833731
2810004N23Rik	Stem cells (SC.MDP)	wilcox	-0.186138721	0.003712848	0.017128603
Gmpr2	Stem cells (SC.MDP)	wilcox	-0.272683893	0.003779231	0.017205448
Man2b1	Stem cells (SC.MDP)	wilcox	-0.187836118	0.003903892	0.017542164
Tpr	Stem cells (SC.MDP)	wilcox	0.336101371	0.003987571	0.017688456
B4galnt1	Stem cells (SC.MDP)	wilcox	-0.224398858	0.004061081	0.017786508
Lzic	Stem cells (SC.MDP)	wilcox	0.222813481	0.004113318	0.017790099
Ergic1	Stem cells (SC.MDP)	wilcox	-0.21989847	0.004251696	0.018012699
Zfp282	Stem cells (SC.MDP)	wilcox	-0.203499478	0.004306184	0.018012699
Itm2b	Stem cells (SC.MDP)	wilcox	-0.191364919	0.004320965	0.018012699
Snx14	Stem cells (SC.MDP)	wilcox	-0.235443519	0.004394998	0.018103207
Srsf6	Stem cells (SC.MDP)	wilcox	-0.259039208	0.004552021	0.018529405
Timm9	Stem cells (SC.MDP)	wilcox	-0.277779688	0.004733358	0.018910384
Mrps6	Stem cells (SC.MDP)	wilcox	-0.226696662	0.004754923	0.018910384
Mrpl15	Stem cells (SC.MDP)	wilcox	-0.228746317	0.00494508	0.019247476
Osm	Stem cells (SC.MDP)	wilcox	-0.276868186	0.00497398	0.019247476
Tomm40	Stem cells (SC.MDP)	wilcox	-0.256639181	0.005006569	0.019247476
Uhmk1	Stem cells (SC.MDP)	wilcox	0.186596215	0.005426974	0.020461486
Idnk	Stem cells (SC.MDP)	wilcox	-0.244969943	0.005440626	0.020461486
Csnk1g2	Stem cells (SC.MDP)	wilcox	0.197513046	0.005570853	0.020725968
Mpo	Stem cells (SC.MDP)	wilcox	-0.306687873	0.005900797	0.021366707
Usp7	Stem cells (SC.MDP)	wilcox	0.188035172	0.00598056	0.021366707
Mtf1	Stem cells (SC.MDP)	wilcox	-0.188309217	0.005982753	0.021366707
Mrpl21	Stem cells (SC.MDP)	wilcox	-0.226876129	0.006037244	0.021366707
Il6ra	Stem cells (SC.MDP)	wilcox	0.191004342	0.00609392	0.021366707
Il2rg	Stem cells (SC.MDP)	wilcox	-0.284555443	0.006113595	0.021366707
Ripk1	Stem cells (SC.MDP)	wilcox	0.197002114	0.006206032	0.021472869
Sssca1	Stem cells (SC.MDP)	wilcox	-0.312075954	0.006350908	0.021512646
Dhrs13	Stem cells (SC.MDP)	wilcox	-0.222225752	0.006392328	0.021512646
Muc13	Stem cells (SC.MDP)	wilcox	-0.238780415	0.006404054	0.021512646
Prmt3	Stem cells (SC.MDP)	wilcox	-0.210974938	0.00650389	0.021637942
P4hb	Stem cells (SC.MDP)	wilcox	-0.195529857	0.007082063	0.023323555
Nsmce1	Stem cells (SC.MDP)	wilcox	-0.232289372	0.007145366	0.023323555
Tspan32	Stem cells (SC.MDP)	wilcox	-0.216233057	0.007454625	0.024105611
Ssh2	Stem cells (SC.MDP)	wilcox	0.19963917	0.007581182	0.024231874
Tuba1c	Stem cells (SC.MDP)	wilcox	-0.220014512	0.007633741	0.024231874
Hist1h2ae	Stem cells (SC.MDP)	wilcox	0.434511034	0.007822007	0.024603766
Imp4	Stem cells (SC.MDP)	wilcox	-0.226329318	0.008007223	0.024950398
Srrm2	Stem cells (SC.MDP)	wilcox	0.276312164	0.00807643	0.024950398
Ddost	Stem cells (SC.MDP)	wilcox	-0.209411174	0.008183492	0.025057418
Selenos	Stem cells (SC.MDP)	wilcox	-0.214398674	0.008813094	0.026748512
Ly6d	Stem cells (SC.MDP)	wilcox	0.209660807	0.009158234	0.027290826
Dhrs7b	Stem cells (SC.MDP)	wilcox	-0.235625093	0.009172017	0.027290826
Lyz2	Stem cells (SC.MDP)	wilcox	-0.23610324	0.009228401	0.027290826
Yipf5	Stem cells (SC.MDP)	wilcox	-0.189144393	0.009333979	0.027360223
Tmem108	Stem cells (SC.MDP)	wilcox	0.425847673	0.009410019	0.027360223
Hspa5	Stem cells (SC.MDP)	wilcox	-0.233323851	0.009621659	0.027557107
Irf2bp2	Stem cells (SC.MDP)	wilcox	0.203441616	0.009637023	0.027557107
Hmgb2	Stem cells (SC.MDP)	wilcox	0.188258966	0.0099066	0.027811636
Golph3	Stem cells (SC.MDP)	wilcox	0.18404488	0.010016741	0.027811636
Thoc7	Stem cells (SC.MDP)	wilcox	-0.203960126	0.010049907	0.027811636
Nelfe	Stem cells (SC.MDP)	wilcox	-0.257930551	0.010178637	0.027811636
Ddx41	Stem cells (SC.MDP)	wilcox	-0.182585645	0.010258009	0.027811636
Ift27	Stem cells (SC.MDP)	wilcox	-0.207280159	0.010306506	0.027811636
Hist1h2an	Stem cells (SC.MDP)	wilcox	0.218018163	0.010372883	0.027811636
Ndufb9	Stem cells (SC.MDP)	wilcox	0.188468064	0.01039739	0.027811636
Ctsz	Stem cells (SC.MDP)	wilcox	-0.205049452	0.010493848	0.027811636
Txndc15	Stem cells (SC.MDP)	wilcox	-0.18957629	0.010529839	0.027811636
Adprh	Stem cells (SC.MDP)	wilcox	-0.286779399	0.011000469	0.028834564
Cd69	Stem cells (SC.MDP)	wilcox	-0.325291186	0.011435397	0.029749229
Gsr	Stem cells (SC.MDP)	wilcox	-0.207002723	0.011665197	0.02997505
Dhx9	Stem cells (SC.MDP)	wilcox	0.280031139	0.011695468	0.02997505
Ddx49	Stem cells (SC.MDP)	wilcox	-0.2488274	0.011793669	0.030004482
Ebi3	Stem cells (SC.MDP)	wilcox	-0.304770499	0.012419508	0.031366056
Svbp	Stem cells (SC.MDP)	wilcox	-0.211654153	0.012690756	0.031684698
Mgme1	Stem cells (SC.MDP)	wilcox	-0.283121945	0.012728824	0.031684698
Nans	Stem cells (SC.MDP)	wilcox	-0.243665153	0.012864215	0.031792989
Pold2	Stem cells (SC.MDP)	wilcox	-0.232493604	0.012994055	0.03188612
Mrpl13	Stem cells (SC.MDP)	wilcox	-0.237982366	0.013109402	0.031942626
Wdr26	Stem cells (SC.MDP)	wilcox	0.269001232	0.013242624	0.032041593
Lgmn	Stem cells (SC.MDP)	wilcox	0.196026987	0.013655306	0.032810666
Vill	Stem cells (SC.MDP)	wilcox	0.189355149	0.014173269	0.033597934
Tmed4	Stem cells (SC.MDP)	wilcox	-0.249869758	0.014177163	0.033597934
Psmd7	Stem cells (SC.MDP)	wilcox	-0.18979618	0.014457981	0.034030351
Cfdp1	Stem cells (SC.MDP)	wilcox	-0.239178513	0.014699389	0.034364788
Rpn2	Stem cells (SC.MDP)	wilcox	-0.190530479	0.014888568	0.034573453
Gbp2	Stem cells (SC.MDP)	wilcox	-0.219815238	0.015138259	0.034918918
Mydgf	Stem cells (SC.MDP)	wilcox	-0.249243347	0.015488722	0.035482171
Fh1	Stem cells (SC.MDP)	wilcox	0.209139975	0.015587543	0.035482171
Pycrl	Stem cells (SC.MDP)	wilcox	-0.262302314	0.015735244	0.035584277
Pak1	Stem cells (SC.MDP)	wilcox	-0.183352458	0.015897608	0.035587585
Eml4	Stem cells (SC.MDP)	wilcox	0.270944054	0.015990719	0.035587585
Aasdhppt	Stem cells (SC.MDP)	wilcox	-0.211695312	0.016104209	0.035587585
Tspan31	Stem cells (SC.MDP)	wilcox	-0.255862918	0.016148124	0.035587585
Ppp1r15a	Stem cells (SC.MDP)	wilcox	-0.190604141	0.016342226	0.035648932
Ppan	Stem cells (SC.MDP)	wilcox	-0.27319913	0.016388308	0.035648932
Itsn2	Stem cells (SC.MDP)	wilcox	0.286937931	0.016561932	0.035648932
Tnrc6b	Stem cells (SC.MDP)	wilcox	0.198871927	0.016663868	0.035648932
Wdr1	Stem cells (SC.MDP)	wilcox	-0.215866893	0.016691118	0.035648932
1810037I17Rik	Stem cells (SC.MDP)	wilcox	0.185673409	0.017719019	0.037459583
Atf4	Stem cells (SC.MDP)	wilcox	-0.217576279	0.017881684	0.037459583
Top2a	Stem cells (SC.MDP)	wilcox	0.314104534	0.017952034	0.037459583
Iqgap1	Stem cells (SC.MDP)	wilcox	0.295198225	0.017971938	0.037459583
Enkd1	Stem cells (SC.MDP)	wilcox	-0.20064259	0.018460967	0.038248471
Phf5a	Stem cells (SC.MDP)	wilcox	-0.201938691	0.018872139	0.038867619
Rnf138	Stem cells (SC.MDP)	wilcox	-0.25400548	0.019360227	0.039636915
Ankhd1	Stem cells (SC.MDP)	wilcox	-0.194447819	0.019995132	0.040462381
Nupl1	Stem cells (SC.MDP)	wilcox	0.20245668	0.020010307	0.040462381
Spcs3	Stem cells (SC.MDP)	wilcox	0.215905068	0.020222109	0.040462381
Rps6ka1	Stem cells (SC.MDP)	wilcox	-0.225913475	0.02023119	0.040462381
Parp1	Stem cells (SC.MDP)	wilcox	0.255524949	0.020646373	0.040949937
Apbb1ip	Stem cells (SC.MDP)	wilcox	0.303027006	0.020830026	0.040949937
Hdac3	Stem cells (SC.MDP)	wilcox	-0.231764562	0.020830026	0.040949937
Mrpl11	Stem cells (SC.MDP)	wilcox	-0.188079605	0.021109032	0.041084037
Nkg7	Stem cells (SC.MDP)	wilcox	-0.233900015	0.021153671	0.041084037
Cad	Stem cells (SC.MDP)	wilcox	0.190334564	0.021282744	0.041084037
Tmem9b	Stem cells (SC.MDP)	wilcox	-0.2368029	0.021449216	0.041084037
Prdx4	Stem cells (SC.MDP)	wilcox	0.244922513	0.02159474	0.041084037
Zfp958	Stem cells (SC.MDP)	wilcox	0.195608434	0.021610679	0.041084037
Psmd5	Stem cells (SC.MDP)	wilcox	-0.256139409	0.022042821	0.04167659
Uba1	Stem cells (SC.MDP)	wilcox	-0.210367847	0.022716979	0.042717798
Sdcbp	Stem cells (SC.MDP)	wilcox	-0.182513025	0.023151246	0.043299086
3110040N11Rik	Stem cells (SC.MDP)	wilcox	-0.209860813	0.023680772	0.043836081
Znhit6	Stem cells (SC.MDP)	wilcox	-0.239655955	0.023691755	0.043836081
Nagpa	Stem cells (SC.MDP)	wilcox	-0.205653894	0.024051058	0.044031933
Caprin1	Stem cells (SC.MDP)	wilcox	0.218596183	0.024177268	0.044031933
Ercc1	Stem cells (SC.MDP)	wilcox	-0.232484587	0.024179385	0.044031933
Nt5c3	Stem cells (SC.MDP)	wilcox	-0.182330784	0.024616591	0.044593405
H2-DMb1	Stem cells (SC.MDP)	wilcox	-0.199319842	0.025369954	0.045718771
Dnajb11	Stem cells (SC.MDP)	wilcox	-0.184927858	0.025720733	0.046110744
Pdap1	Stem cells (SC.MDP)	wilcox	0.223477321	0.025987785	0.046349349
Prorsd1	Stem cells (SC.MDP)	wilcox	-0.213648451	0.026294042	0.046431786
Itpa	Stem cells (SC.MDP)	wilcox	-0.205032467	0.026400614	0.046431786
Cdc42ep3	Stem cells (SC.MDP)	wilcox	0.338306671	0.026436595	0.046431786
Sin3a	Stem cells (SC.MDP)	wilcox	0.261178765	0.026718431	0.04656788
Esf1	Stem cells (SC.MDP)	wilcox	0.222202619	0.026783261	0.04656788
Supt16	Stem cells (SC.MDP)	wilcox	0.246338507	0.027117182	0.046912725
Cytip	Stem cells (SC.MDP)	wilcox	-0.208665185	0.027413852	0.047190013
Rrm1	Stem cells (SC.MDP)	wilcox	0.211674106	0.027728184	0.047494811
Srm	Stem cells (SC.MDP)	wilcox	-0.183070854	0.027991269	0.047709257
Mad2l1	Stem cells (SC.MDP)	wilcox	-0.208817572	0.028468314	0.048098566
Ltv1	Stem cells (SC.MDP)	wilcox	-0.19076546	0.028641268	0.048098566
Gins1	Stem cells (SC.MDP)	wilcox	-0.237432146	0.028744786	0.048098566
Cbx5	Stem cells (SC.MDP)	wilcox	0.19417111	0.028775732	0.048098566
